# Supplementary material for: Adsorption and UV/Visible photocatalytic performance of BiOI for methyl orange, Rhodamine B and methylene blue: Ag and Ti-loading effects
Source: Royal Society of Chemistry journal article supplement (doi:10.1039/c3ce42654h), 2014-01-01
Supplement: c3ce42654h.pdf [file c3ce42654h.pdf]

## Supporting Information

**Adsorption and UV/Visible photocatalytic performance of BiOI for methyl orange, Rhodamine B and methylene blue: Ag and Ti-loading effects**

**Yohan Park,<sup>1</sup> Yulyi Na,<sup>1</sup> Debabrata Pradhan,<sup>2</sup> Bong-Ki Min,<sup>3</sup> and Youngku Sohn<sup>1,\*</sup>**

<sup>1</sup>Department of Chemistry, Yeungnam University, Gyeongsan 712-749, Republic of Korea

<sup>2</sup>Materials Science Centre, Indian Institute of Technology, Kharagpur 721 302, W.B., India

<sup>3</sup>Instrumental Analysis Center, Yeungnam University, Gyongsan 712-749, Republic of Korea

\* Corresponding author e-mail:youngkusohn@ynu.ac.kr

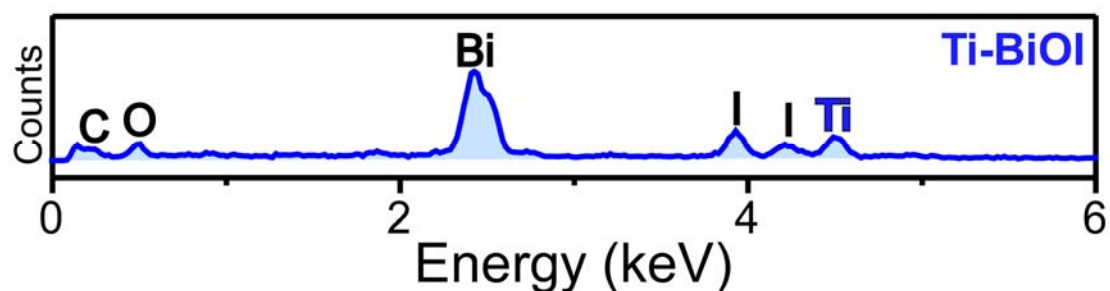

**Figure S1:** Energy-dispersive X-ray spectroscopy (EDX) of Ti-loaded (50 mol%) BiOI prepared in EG.

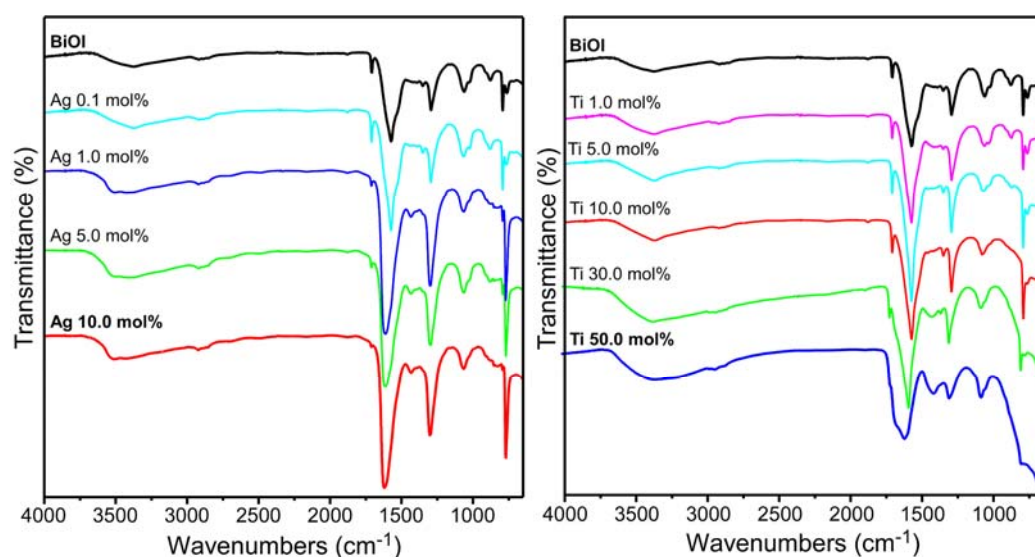

**Figure S2:** FT-IR spectra of undoped and Ag-(left) and Ti-loaded (right) BiOI prepared in water and EG.

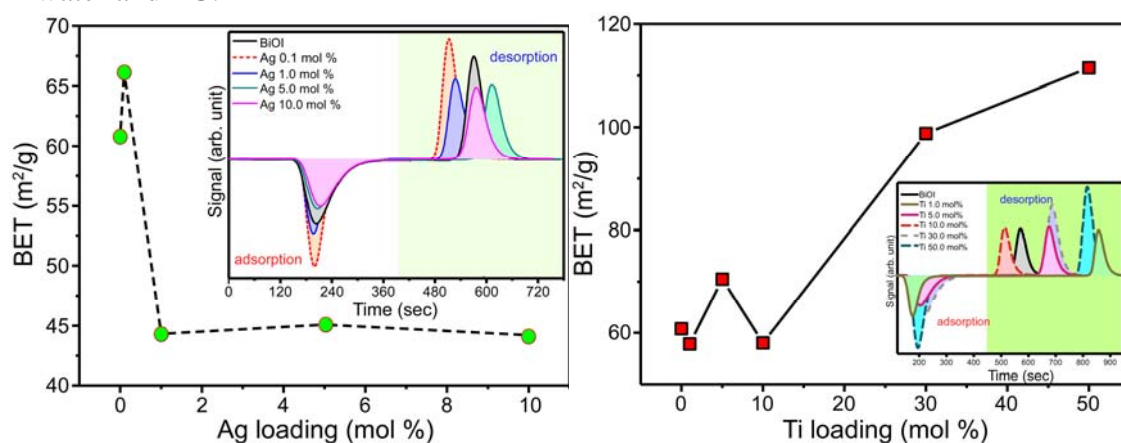

**Figure S3.** Nitrogen adsorption and desorption profiles of BiOI with increasing Ag (left) and Ti (right) loadings.

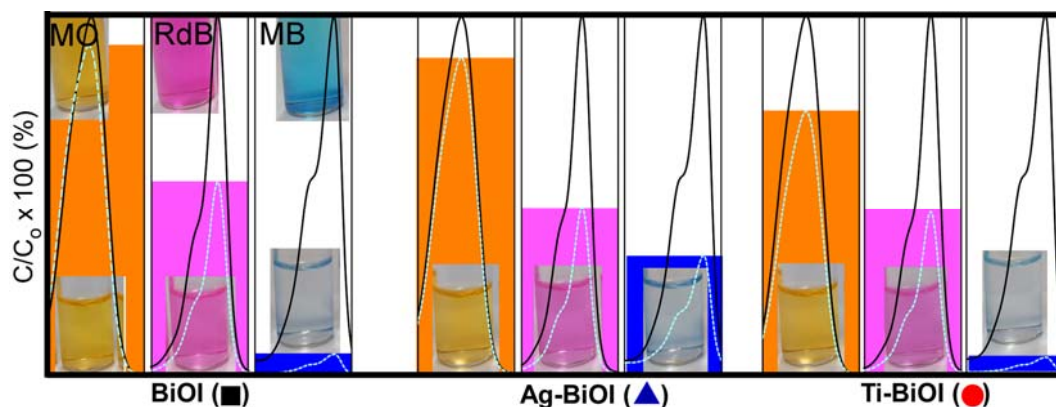

**Figure S4.** UV-visible absorption spectra and the corresponding intensities upon adsorption of MO, RhB and MB (10 mg/L, 50 mL) for 2 hour by 10 mg BiOI, Ag-doped BiOI and Ti-doped BiOI in dark condition. The absorption wavelengths (Fig. S5, Supporting Info.) of the dyes were omitted for clarity.

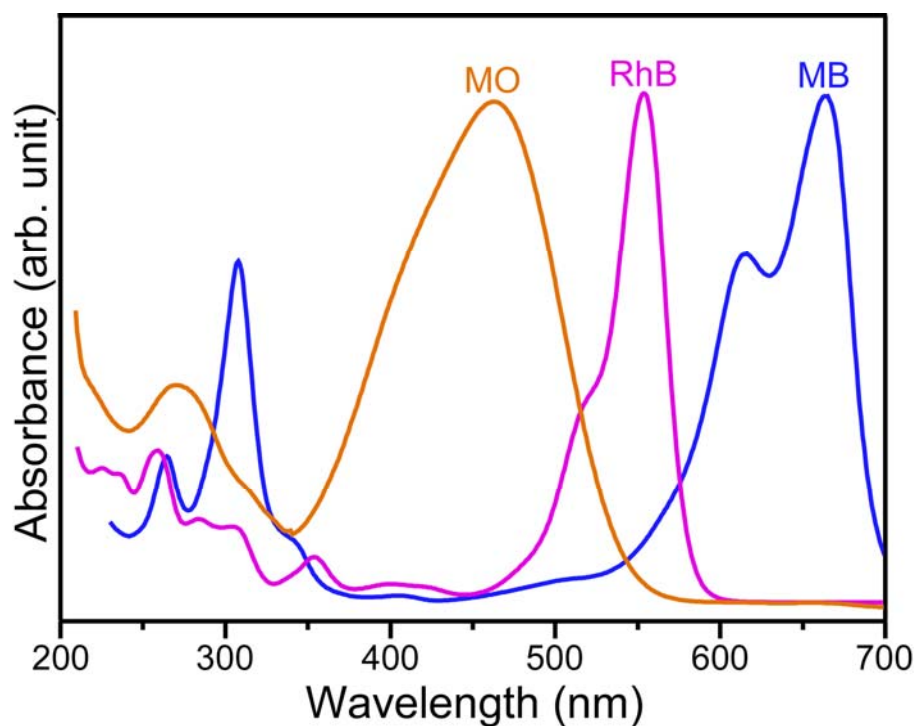

**Figure S5.** UV-visible absorption spectra of three different dye solutions.

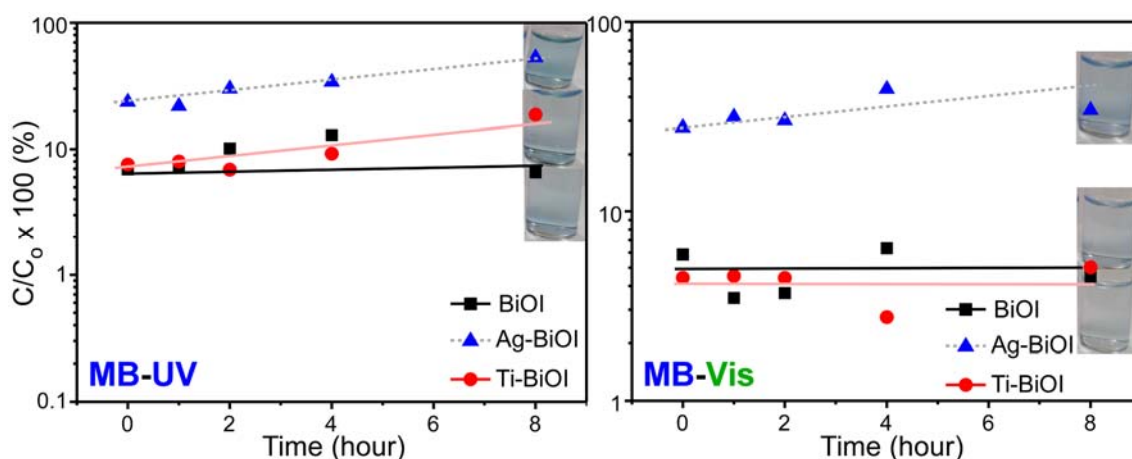

**Figure S6.** Photodegradation of MB solution (10 mg/L, 50 mL) upon adsorption under UV (left column) and visible (right column) light irradiation.

For MB, the fluctuation of the absorption intensity is likely due to adsorption/desorption during photoirradiation.

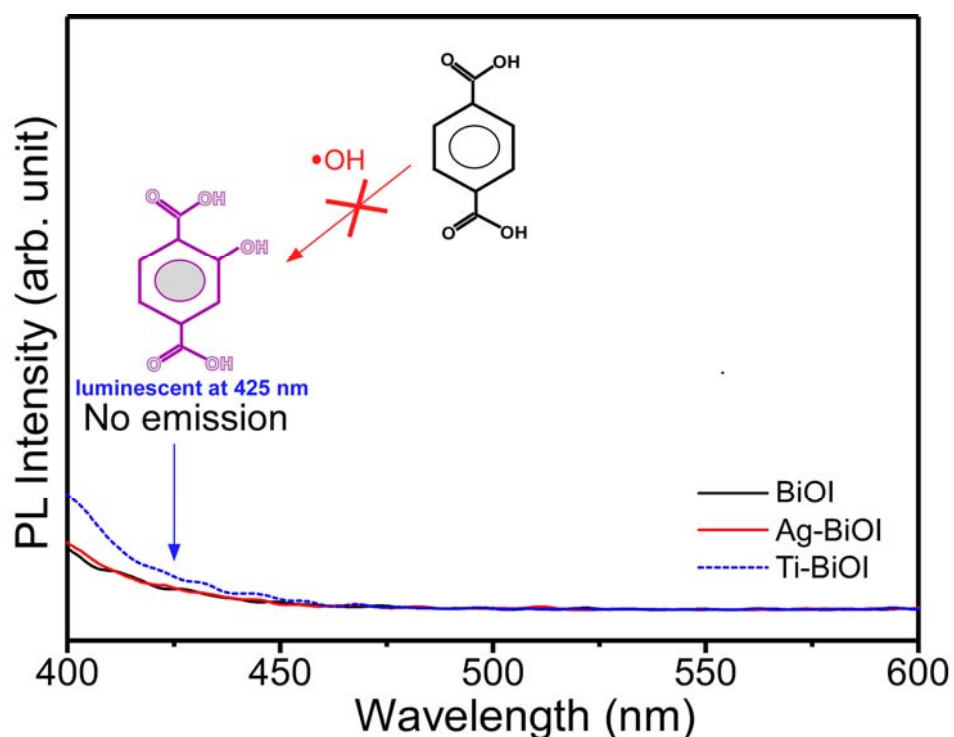

**Figure S7.** Photoluminescence spectra of terephthalic acid solutions with the three (BiOI, 5% Ag-BiOI and 10% Ti BiOI) selected catalysts after visible light irradiation for 6 hrs.
